# Supplementary material for: Implementing an enhanced recovery after thoracic surgery programme in the Netherlands: a qualitative study investigating facilitators and barriers for implementation
Source: PubMed Central journal article supplement — BMJ Open. 2022 Jan 5;12(1):e051513. doi: 10.1136/bmjopen-2021-051513 (PMC8734011; doi:10.1136/bmjopen-2021-051513), 2022-01-05
Supplement: bmjopen-2021-051513supp002.pdf [file bmjopen-2021-051513supp002.pdf]

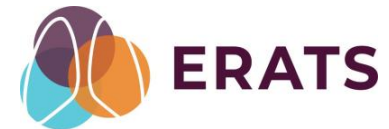

## Codebook Barriers and facilitators related to implementation of ERATS

| Domain                             | Code                                                                                                        | Code in Atlas.ti                                          | Description of the code                                                                                                                                                                                                                                       |
|------------------------------------|-------------------------------------------------------------------------------------------------------------|-----------------------------------------------------------|---------------------------------------------------------------------------------------------------------------------------------------------------------------------------------------------------------------------------------------------------------------|
| <b>SUGGESTIONS FOR IMPROVEMENT</b> | Suggestions for improvement                                                                                 | Suggestions for improvement<br>F Facilitator<br>B Barrier | This is a field in which we collect all suggestions for improvement, such as improvement for the program or components thereof, the organization, personnel, etc.                                                                                             |
| <b>1 Broader Context</b>           | <b>Any factor that relates to the broader context in which lung surgery is performed in the Netherlands</b> |                                                           |                                                                                                                                                                                                                                                               |
| 1 Broader Context                  | 1.1 Communication between Hospitals/HCPs                                                                    | Communication HCPs F<br>Communication HCPs B              | <ul style="list-style-type: none"> <li>Everything mentioned with regard to communication between hospitals / HealthCare Professionals (HCPs)</li> <li>MDO's</li> </ul>                                                                                        |
| 1 Broader Context                  | 1.2                                                                                                         |                                                           |                                                                                                                                                                                                                                                               |
| 1 Broader Context                  | 1.3                                                                                                         |                                                           |                                                                                                                                                                                                                                                               |
| 1 Broader Context                  | 1.4                                                                                                         |                                                           |                                                                                                                                                                                                                                                               |
| <b>2 Patient Factors</b>           | <b>Any factors that relate to the needs, preferences, or behaviour of patients regarding ERATS</b>          |                                                           |                                                                                                                                                                                                                                                               |
| 2 Patient Factors                  | 2.1 Informing patients                                                                                      | Informing patients F<br>Informing patients B              | <ul style="list-style-type: none"> <li>Various media information (movies / website / folder)</li> <li>Clear information</li> <li>Illiteracy</li> <li>Realistic information</li> <li>Consistent information HCP team</li> <li>Managing expectations</li> </ul> |
| 2 Patient Factors                  | 2.2 Autonomy patients                                                                                       | Autonomy patients F<br>Autonomy patients B                | Everything that is mentioned with regard to the autonomy of the patient                                                                                                                                                                                       |

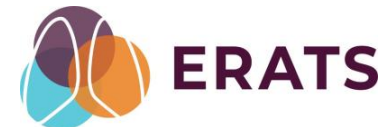

|                       |                                                                                                                                                                          |                                                      |                                                                                                                                                                                                                                                                                                                         |
|-----------------------|--------------------------------------------------------------------------------------------------------------------------------------------------------------------------|------------------------------------------------------|-------------------------------------------------------------------------------------------------------------------------------------------------------------------------------------------------------------------------------------------------------------------------------------------------------------------------|
| 2 Patient Factors     | 2.3 Situation at home                                                                                                                                                    | Home situation F<br>Home situation B                 | <ul style="list-style-type: none"> <li>Anything mentioned with regard to the patient's home situation</li> <li>Having insight into the home situation</li> </ul>                                                                                                                                                        |
| 2 Patient Factors     | 2.4 Age patients                                                                                                                                                         | Age patients F<br>Age patients B                     | Everything that is mentioned regarding the age of the patient                                                                                                                                                                                                                                                           |
| 2 Patient Factors     | 2.5 Physical condition patients                                                                                                                                          | Condition patients F<br>Condition patients B         | <ul style="list-style-type: none"> <li>Be fit for surgery</li> <li>Fit is more important than age</li> <li>Getting fit after surgery</li> </ul>                                                                                                                                                                         |
| <b>3 Team Factors</b> | <b>Any factors that relate to the Team delivering ERATS, especially the ability to deliver a care programme as one team, with one message and consistent information</b> |                                                      |                                                                                                                                                                                                                                                                                                                         |
| 3 Team Factors        | 3.1 inconsistent information team                                                                                                                                        | Inconsistent info team B                             | <ul style="list-style-type: none"> <li>Everyone has their own ways</li> <li>Colleague tells something different / varying stories</li> </ul>                                                                                                                                                                            |
| 3 Team Factors        | 3.2 Case manager                                                                                                                                                         | Case manager F                                       | <ul style="list-style-type: none"> <li>1 point of contact for the patient</li> <li>1 point of contact for the organization</li> <li>Central organizer/manager</li> </ul>                                                                                                                                                |
| 3 Team Factors        | 3.3 Handover/consultation HCPs                                                                                                                                           | Handover HCPs F<br>Handover HCPs B                   | <ul style="list-style-type: none"> <li>Inadequate referral to pain team</li> <li>Presence of cross-team consultation</li> <li>Good handovers between HCPs</li> <li>Short lines between HCPs</li> <li>Good cooperation with anaesthesiology department</li> <li>Explanation of the process by lung specialist</li> </ul> |
| 3 Team Factors        | 3.4 contact post-discharge                                                                                                                                               | Post-discharge contact F<br>Post-discharge contact B | <ul style="list-style-type: none"> <li>Active: receiving a call after discharge</li> <li>Passive: having a telephone number to call after discharge</li> </ul>                                                                                                                                                          |
| 3 Team Factors        | 3.5 Quality HCPs                                                                                                                                                         | Quality HCP F<br>Quality HCP B                       | <ul style="list-style-type: none"> <li>Stricter guidance by physiotherapist</li> <li>Clear appointments with physiotherapist</li> <li>Strict and clear guidance by nurses</li> </ul>                                                                                                                                    |
| 3 Team Factors        | 3.6 Work pressure Ward                                                                                                                                                   | Work pressure ward B                                 | <ul style="list-style-type: none"> <li>Overburdened nurses/limited time</li> </ul>                                                                                                                                                                                                                                      |

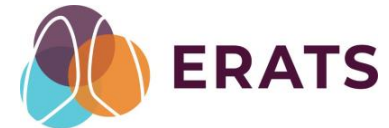

|                           |                                                                                                |                                                                                    |                                                                                                                                                                                                                                                                                                   |
|---------------------------|------------------------------------------------------------------------------------------------|------------------------------------------------------------------------------------|---------------------------------------------------------------------------------------------------------------------------------------------------------------------------------------------------------------------------------------------------------------------------------------------------|
| 3 Team Factors            | 3.7 Willingness to change                                                                      | Willingness to change F<br>Willingness to change B                                 | <ul style="list-style-type: none"> <li>• Rigidity by ward personnel</li> <li>• Being early adopters</li> <li>• Initiative for change with the surgeons</li> </ul>                                                                                                                                 |
| 3 Team Factors            | 3.8 Support team leaders                                                                       | Support team leader F<br>Support team leader B                                     |                                                                                                                                                                                                                                                                                                   |
| 3 Team Factors            | 3.9 Use of patient experiences                                                                 | Use patient experiences F<br>Use patient experiences B                             | <ul style="list-style-type: none"> <li>• Person to share personal experiences with at time of discharge</li> <li>• Periodic reflective conversations with team and former patients</li> </ul>                                                                                                     |
| <b>4 Protocol Factors</b> | <b>Any factors that relate to the ERATS protocol, its materials, evidence for the program.</b> |                                                                                    |                                                                                                                                                                                                                                                                                                   |
| 4 Protocol Factors        | 4.1 concise protocol                                                                           | concise protocol F<br>concise protocol B                                           | <ul style="list-style-type: none"> <li>• The old protocol is very extensive</li> </ul>                                                                                                                                                                                                            |
| 4 Protocol Factors        | 4.2 Flexibility within bandwidth                                                               | Flexibility within bandwidth F<br>Flexibility within bandwidth B                   | <ul style="list-style-type: none"> <li>• Prior arrangements with anaesthesiology</li> <li>• Room for flexibility within the protocol</li> <li>• Possibility to personalise treatment within constraints of the protocol</li> <li>• Protocol = basis; individualising is a possibility.</li> </ul> |
| 4 Protocol Factors        | 4.3 Logistics time MDT-operation                                                               | Logistics time MDT-operation F<br>Logistics time MDT-operation B                   | <ul style="list-style-type: none"> <li>• Limited time for preparation by physiotherapist/dietician</li> <li>• Rigid guideline regarding time between MDT-Operation</li> <li>• Limited time between intake-operation</li> </ul>                                                                    |
| 4 Protocol Factors        | 4.4 knowledge of the protocol by HCP                                                           | knowledge of the protocol by HCP F<br>knowledge of the protocol by HCP B           | <ul style="list-style-type: none"> <li>• Not all HCPs know the perioperative protocol.</li> </ul>                                                                                                                                                                                                 |
| 4 Protocol Factors        | 4.5 Variation protocols/old protocols                                                          | Variation protocols/old protocols F<br>Variation protocols/old protocols B         | <ul style="list-style-type: none"> <li>• Old situation: every speciality has their own protocol</li> </ul>                                                                                                                                                                                        |
| 4 Protocol Factors        | 4.6 Minimally invasive surgical technique                                                      | Minimally invasive surgical technique F<br>Minimally invasive surgical technique B | <ul style="list-style-type: none"> <li>• Strive for a minimally invasive technique</li> </ul>                                                                                                                                                                                                     |

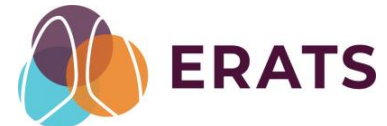

|                           |                                                                                                                              |                                                            |                                                                                                                                                                                                                                                                                                                                                                                               |
|---------------------------|------------------------------------------------------------------------------------------------------------------------------|------------------------------------------------------------|-----------------------------------------------------------------------------------------------------------------------------------------------------------------------------------------------------------------------------------------------------------------------------------------------------------------------------------------------------------------------------------------------|
| 4 Protocol Factors        | 4.7 Protocol discharge criteria clear                                                                                        | Protocol discharge criteria clear F                        | <ul style="list-style-type: none"> <li>• Electronic chest drain systems are sometimes hard to interpret</li> <li>• Pain and airleak are important factors for LOS</li> <li>• Clear discharge criteria</li> <li>• Data electroic drain system as input for clinical decisions</li> </ul>                                                                                                       |
| 4 Protocol Factors        | 4.8 Protocol pain management clear                                                                                           | Protocol pain management clear F                           | <ul style="list-style-type: none"> <li>• Pain management without catheters</li> <li>• Urinar catheter/epidural limit mobilisation</li> <li>• Variety of methods in pain management</li> <li>• Pain immediatly postoperatively</li> <li>• Pain and nausea limit recovery</li> </ul>                                                                                                            |
| 4 Protocol Factors        | 4.9 Limited support Transfer hospital - home                                                                                 | Limited support Transfer hospital - home B                 | <ul style="list-style-type: none"> <li>• Preparing for the influence of the operation on the situation at home</li> <li>• Uncertainty regarding breathing after discharge</li> <li>• Availability support in transition hospital-home</li> <li>• Support from social services</li> </ul>                                                                                                      |
| <b>5 Hospital Factors</b> | <b>Any factors that relate to the abilities and organisation of the hospital that influence the implementation of ERATS.</b> |                                                            |                                                                                                                                                                                                                                                                                                                                                                                               |
| 5 Hospital Factors        | 5.1 Workload Data registration                                                                                               | Workload Data registration B                               | <ul style="list-style-type: none"> <li>• Workload national audit data gathering</li> <li>• Data registration not directy from EMR</li> </ul>                                                                                                                                                                                                                                                  |
| 5 Hospital Factors        | 5.2 Logistics MDT - operation                                                                                                | Logistics MDT -operation F<br>Logistics MDT -operation B   | <ul style="list-style-type: none"> <li>• Intake process with a departments invoved</li> <li>• Monitoring &amp; managing time between MDT and Operation</li> <li>• Week planning: planning opertions reated to MDT date</li> <li>• Clarity on operation date</li> <li>• Support from vounteers during intake process</li> <li>• Patients want tob e operated on as soon as possible</li> </ul> |
| 5 Hospital Factors        | 5.3 Added value data feedback                                                                                                | Added value data feedback F<br>Added value data feedback B | <ul style="list-style-type: none"> <li>• Limited motivation for data registration (without data feedback)</li> <li>• Iimited to financial data</li> <li>• Data feedback can improve care</li> <li>• Feedback data/3months</li> </ul>                                                                                                                                                          |

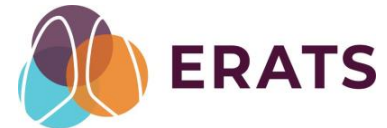

|                          |                                                                                                              |                                                                                  |                                                                                                                                                                                                                                             |
|--------------------------|--------------------------------------------------------------------------------------------------------------|----------------------------------------------------------------------------------|---------------------------------------------------------------------------------------------------------------------------------------------------------------------------------------------------------------------------------------------|
|                          |                                                                                                              |                                                                                  | <ul style="list-style-type: none"> <li>• Irregular feedback from national audit programme</li> <li>• Benchmark</li> </ul>                                                                                                                   |
| 5 Hospital Factors       | 5.4 Support for innovation by management                                                                     | Support for innovation by management F<br>Support for innovation by management B | <ul style="list-style-type: none"> <li>• Support from departmental management</li> <li>• Support from quality improvement officers</li> </ul>                                                                                               |
| 5 Hospital Factors       | 5.5 Complete dataset for ERATS                                                                               | Complete dataset for ERATS                                                       | <ul style="list-style-type: none"> <li>• No established PROMS set</li> <li>• No data feedback</li> </ul>                                                                                                                                    |
| <b>6 Surgeon factors</b> | <b>Any factors that relate to the Surgeon performing the lung resection and providing perioperative care</b> |                                                                                  |                                                                                                                                                                                                                                             |
| 6 Surgeon factors        | 6.1 Experience surgeon                                                                                       | Experience surgeon F<br>Experience surgeon B                                     | <ul style="list-style-type: none"> <li>• Experience HCP (number of operations performed/number of patients treated)</li> </ul>                                                                                                              |
| 6 Surgeon factors        | 6.2 Presence/availability surgeon                                                                            | Presence/availability surgeon F<br>Presence/availability surgeon B               | <ul style="list-style-type: none"> <li>• HCP/Surgeon available at the bedside</li> <li>• Sufficient time for patient education</li> <li>• Communication HCPs-patient</li> <li>• Consultation by the surgeon at time of discharge</li> </ul> |
| 6 Surgeon factors        | Empathy HCP                                                                                                  | Empathy HCP F<br>Empathy HCP B                                                   |                                                                                                                                                                                                                                             |
